1  
2  
3  
4  
5  
6  
7  
8  
9  
10  
11  
12  
13  
14  
15  
16  
17  
18  
19  
20  
21

Original Research

Geographic and temporal trends in fentanyl-involved deaths in Connecticut, 2009-2019

Haidong Lu<sup>1,2</sup>, Forrest W. Crawford<sup>2,3,4,5,6</sup>, Gregg S. Gonsalves<sup>1,2,7</sup>, Laretta E. Grau<sup>1</sup>

<sup>1</sup>Department of Epidemiology of Microbial Diseases, Yale School of Public Health, New Haven, CT, USA

<sup>2</sup>Public Health Modeling Unit, Yale School of Public Health, New Haven, CT, USA

<sup>3</sup>Department of Biostatistics, Yale School of Public Health, New Haven, CT, USA

<sup>4</sup>Department of Statistics & Data Science, Yale University, New Haven, CT, USA

<sup>5</sup>Department of Ecology & Evolutionary Biology, Yale University, New Haven, CT, USA

<sup>6</sup>Yale School of Management, New Haven, CT, USA

<sup>7</sup>Yale Law School, New Haven, CT, USA

**Running title:** Trends in fentanyl-involved deaths in Connecticut

**Correspondence:** Gregg Gonsalves

Public Health Modeling Unit and Department of Epidemiology of Microbial Diseases  
Yale School of Public Health

22 350 George Street, Ste 3<sup>rd</sup> Floor

23 New Haven, CT 06511

24 Phone: +1 (203) 606-9149

25 [gregg.gonsalves@yale.edu](mailto:gregg.gonsalves@yale.edu)

26 **Funding sources:** National Institutes of Health/National Institute on Drug Abuse DP2-DA049282

27 and R37DA15612); National Institutes of Health/Eunice Kennedy Shriver

28 National Institute of Child Health and Human Development DP2-HD091799

29 **Conflict of interest:** None declared.

30 **Data and code:** Data are available on request.

31 **Word count:** abstract 240/250; main text 2583

32 **Acknowledgements:** We are also grateful to Dr. James R. Gill and his staff at the Connecticut

33 Office of the Chief Medical Examiner for providing access to data. In

34 addition, we thank Joshua L. Warren, Thomas A. Thornhill, Julia Dennett,

35 and A Ram for helpful comments.

36

37

38

39

40

41 **ABSTRACT**

42 **Background:** Since 2012 fentanyl-involved fatal overdoses have risen from 4% of all fatal  
43 overdoses in Connecticut to 82% in 2019. We investigated the geographic and temporal trends  
44 in fentanyl-involved deaths in Connecticut during 2009-2019 and examined the relationship of  
45 fentanyl-involved deaths and overall trends of opioid overdose deaths.

46 **Methods:** Data on the dates and locations of accidental/undetermined opioid-involved  
47 fatalities that occurred during 2009-2019 were obtained from Connecticut Office of the Chief  
48 Medical Examiner. Using a Bayesian space-time binomial model adjusted for demographic  
49 covariates, we estimated spatial and temporal trends in the proportion of fentanyl-involved  
50 deaths, as well as overall opioid-involved overdose deaths.

51 **Results:** During 2009-2019, a total of 6,632 opioid-involved overdose deaths were identified.  
52 Among these, 3,234 (49%) were fentanyl-involved. The modeled spatial patterns suggested that  
53 opioid-involved deaths in northeastern Connecticut had higher probability of being fentanyl-  
54 involved, while New Haven and its neighboring towns and the southwestern region of  
55 Connecticut, primarily Greenwich, had a lower risk. Model estimates also suggested the  
56 geographic patterns of fentanyl-involved deaths gradually overtook the preceding non-fentanyl  
57 opioid overdose deaths. The estimated temporal trend showed the probability of fentanyl  
58 involvement increased substantially since 2014.

59 **Conclusion:** Our findings suggest that geographic variation exists in the probability of fentanyl-  
60 involved deaths, and areas at heightened risk are identified. Further studies are warranted to  
61 explore the factors contributing to the geographic heterogeneity and continuing dispersion of

62 fentanyl-involved fatal overdoses in Connecticut. Such efforts could inform overdose

63 prevention and intervention strategies.

64 **Keywords:** fentanyl; overdose; opioid crisis; Bayesian disease mapping; spatial-temporal

65 analysis

66

67 The three waves of the American opioid crisis (i.e., prescription opioids, heroin, and synthetic  
68 opioids other than methadone) continue to be a significant public health emergency in the  
69 United States (US).<sup>1</sup> Beginning in late 2013, synthetic opioid-involved overdoses (chiefly illicitly  
70 produced fentanyl and fentanyl analogs) have dominated the ongoing third wave of the opioid  
71 crisis.<sup>2</sup> Illicit drug supply is the key driver of the current opioid crisis.<sup>3</sup> Illicitly manufactured  
72 fentanyl and fentanyl analogs, which are less costly to produce and distribute (but are 50 to 100  
73 times more potent than morphine),<sup>4</sup> have increased in the US drug market.<sup>5</sup> Reports from the  
74 US Drug Enforcement Administration highlighted the dramatic increase in drug seizures that  
75 tested positive for fentanyl, from 4,642 in 2014 to 98,954 in 2019 in the US.<sup>6,7</sup> The national rate  
76 of drug overdose deaths involving fentanyl increased dramatically from 0.5 per 100,000 persons  
77 in 2011 to 5.9 per 100,000 in 2016.<sup>8</sup> From 2014 to 2015, overdose deaths attributed to  
78 synthetic opioids (primarily illicitly manufactured fentanyl) increased by 72% to nearly 10,000.<sup>9</sup>  
79 Most recently, the rate of drug overdose deaths involving synthetic opioids rose by 27%, from  
80 9.0 per 100,000 in 2017 to 11.4 in 2019.<sup>10,11</sup> In 2018, fentanyl and its analogs were involved in  
81 approximately two thirds of opioid deaths.<sup>12</sup>

82

83 Abrupt-changes in illicit drug supply may have contributed to the heightened risk of opioid  
84 overdoses since 2013 and the influx of fentanyl.<sup>3</sup> Examining the spatial and temporal trends of  
85 fentanyl-involved deaths may help public health researchers and policymakers better  
86 understand geographic and temporal variation in fentanyl availability. While several studies  
87 have been conducted to investigate the small-area geographic distribution of fentanyl-involved  
88 overdose deaths<sup>13,14</sup>, to our knowledge, no research has explored whether the fentanyl-

89 involved overdose deaths simply take over the rising overall opioid-involved overdoses in the  
90 same geographic region or whether fentanyl has established new regions of risk for overdose  
91 where, previously, overdoses were less common.

92  
93 To further inform overdose prevention and intervention efforts, we investigated the geographic  
94 and temporal trends of fentanyl-involved overdose deaths at the city/town level in Connecticut,  
95 a state that is highly affected by the opioid crisis. We examined whether spatial and temporal  
96 distributions of fentanyl-involved overdose deaths covary with overall trends of opioid-involved  
97 overdose deaths, and whether the rising tide of fentanyl-involved overdose deaths follows a  
98 geographic pattern different from that of the preceding wave of opioid-involved overdose  
99 deaths.

100

## 101 **METHODS**

### 102 *Study Sample and Data*

103 We obtained data on all opioid-involved overdose deaths from the records of the Connecticut  
104 Office of the Chief Medical Examiner (OCME), including the cause and manner of death,  
105 toxicological test results in available specimens, demographic information (i.e., age, sex,  
106 race/ethnicity), and the addresses of residence, injury, and/or death for each case.<sup>15,16</sup>

107

108 All opioid-involved overdose deaths from 2009 to 2019 in Connecticut that the OCME  
109 determined to be of accidental or undetermined manner were included in this analysis. Non-  
110 residents in Connecticut were excluded. We dichotomized the opioids involved in the overdose

111 deaths (i.e., fentanyl-involved versus non-fentanyl-involved). Other substances of interest  
112 included heroin/morphine, pharmaceutical opioids (i.e., di-hydrocodeine, hydromorphone,  
113 hydrocodone, hydromorphone, oxymorphone, and tramadol), methadone/buprenorphine,  
114 benzodiazepines, cocaine, ethanol, methamphetamine, xylazine, mitragynine (kratom), and  
115 gabapentin. This research project has been reviewed by the Connecticut OCME and deemed  
116 not human subjects research by the Yale University Human Investigations Committee.

117

### 118 *Geospatial Data*

119 All residential, injury, and death addresses were geocoded within ArcGIS (ESRI, Redlands, CA).  
120 Unmatched addresses were then reviewed manually and geocoded using ArcGIS or the R  
121 package *tidygeocoder*<sup>17</sup>. In cases where decedents were listed as homeless or where no address  
122 was recorded, these cases were not geocoded. Decedents with residential addresses outside  
123 Connecticut were excluded. Injury addresses were used as primary locales for the space-time  
124 model and mapping the spatial trends. If injury addresses were unknown, residential addresses  
125 were used instead. If both addresses were unknown, death addresses were used. The geocoded  
126 overdose deaths were then assigned to one of the 169 corresponding cities or towns in  
127 Connecticut.

128

### 129 *Covariates*

130 We used demographic information available for residential population at the city/town level in  
131 the Connecticut from the American Community Survey (ACS).<sup>18</sup> We linked these with the  
132 city/town-level ACS 5-year estimates from 2015-2019 data and 2010-2014 data to the opioid-

133 involved overdose death records in 2015-2019 and in 2009-2014, respectively. The covariates  
134 were the total population size, proportion of the population by demographic covariates (i.e.,  
135 age groups, sex, race, ethnicity and education level), proportion foreign born, the proportion  
136 with home ownership, median household income, and poverty rate.

137

### 138 *Statistical Analyses*

139 We first described demographic information of the decedents with opioid-involved fatal  
140 overdoses in Connecticut, stratified by fentanyl-involved overdose deaths and non-fentanyl  
141 overdose deaths. Then we examined spatial and temporal trends for all opioid-involved  
142 overdose deaths in Connecticut. We modelled the number of opioid-involved overdose deaths  
143  $n_{it}$  in town  $i$  during year  $t$  as independently and identically Poisson distributed variables with  
144 mean  $\lambda_{it}$ ,

$$n_{it} \sim \text{Poisson}(\lambda_{it})$$

145 The logarithm of the mean number of opioid-involved overdose deaths ( $\lambda_{it}$ ) was then modeled  
146 as

$$\log(\lambda_{it}) = \mathbf{x}_{it}^T \boldsymbol{\beta} + \alpha_i + \gamma_t + \delta_{it} + \log(\text{pop}_n)$$

147 where  $\mathbf{x}_{it}$  is the vector of covariates for town  $i$  at year  $t$  (including the time-varying and space-  
148 varying variables from the ACS), and  $\boldsymbol{\beta}$  is a vector of fixed effect coefficients for  $\mathbf{x}_{it}$ . In addition,  
149  $\alpha_i$  is the town-level spatial main effect,  $\gamma_t$  is the yearly temporal main effect, and  $\delta_{it}$  is the  
150 interaction term between space (town level) and time (year). The population size in each  
151 city/town was included as an offset  $\log(\text{pop}_n)$  for the Poisson model. The spatial term  $\alpha_i$  is a  
152 random effect that follows the conditional autoregressive model proposed by Besag, York and



153 Mollie.<sup>19</sup> The random effect can be further decomposed into two components, an intrinsic  
154 conditional autoregressive term that smooths each city/town-level estimate by forming a  
155 weighted average with all adjacent jurisdictions, plus a spatially unstructured component that  
156 models independent location-specific error and is assumed to be independently, identically,  
157 and normally distributed across cities or towns. The temporal trend  $\gamma_t$  is modeled by the sum of  
158 two components, a first-order random walk-correlated time component, and a temporally  
159 unstructured component that models independent year-specific error and is independently,  
160 identically, and normally distributed across calendar years. The space-time interaction term  $\delta_{it}$ ,  
161 is modelled as an independent noise term for each city/town and time period and allows for  
162 temporal trends in a given city/town to deviate from the overall spatial and temporal trends  
163 given by  $\alpha_i$  and  $\gamma_t$ , so that local patterns can emerge across time and space. Details of the  
164 model specification are described in Appendix S1.

165  
166 Further, we modelled the probability of an opioid-involved overdose death being fentanyl-  
167 involved at the city/town level, using a Bayesian space-time binomial model.<sup>20</sup> We considered a  
168 binomial model for the number of fentanyl-involved overdose deaths conditional on the total  
169 number of opioid-involved overdose deaths in the town areas. Let  $p_{it}$  be the probability of an  
170 opioid-involved overdose death being fentanyl-involved in town  $i$  during year  $t$ . We assumed  
171 that the number of fentanyl-involved overdose deaths  $y_{it}$  in town  $i$  during year  $t$  is distributed  
172 as

$$y_{it} \sim \text{Binomial}(p_{it}, n_{it})$$

173 and the corresponding likelihood is

174 
$$L(y_{it}|p_{it}, n_{it}) = \prod_i \prod_t \binom{n_{it}}{y_{it}} p_{it}^{y_{it}} (1 - p_{it})^{(n_{it}-y_{it})}.$$

175 A logistic regression was used to model the probability  $p_{it}$ , as

$$\text{logit}(p_{it}) = \mathbf{x}_{it}\boldsymbol{\theta} + \mu_i + \varphi_t + \sigma_{it}$$

176 where, similar to model for opioid-involved overdose deaths,  $\mathbf{x}_{it}$  is the vector of covariates for  
177 city/town  $i$  at year  $t$  (including the time-varying and space-varying variables from the ACS), and  
178  $\boldsymbol{\theta}$  is a vector of fixed effect coefficients for  $\mathbf{x}_{it}$ . In addition,  $\mu_i$  in the model is the city/town-level  
179 spatial main effect,  $\varphi_t$  is the yearly temporal main effect, and  $\sigma_{it}$  is the interaction term  
180 between space (city/town level) and time (year). In addition, a Poisson model for counts of  
181 fentanyl-involved overdose deaths among opioid overdose deaths was examined in a sensitivity  
182 analysis.

183  
184 Finally, we used likelihood ratio tests to examine whether the space-time interaction terms  
185 were significantly different from zero in all models. When this term is not significantly different  
186 from zero, it suggests that the geographic pattern of fentanyl-involved overdose deaths does  
187 not vary significantly over the study period.

188  
189 To estimate Bayesian model parameters, we employed integrated nested Laplace  
190 approximations (INLAs) which approximate the full posterior distribution and are a  
191 computationally efficient alternative to Markov Chain Monte Carlo.<sup>21</sup> We used the *R-INLA*  
192 package for model fitting.<sup>22</sup> Model comparison was performed, and details can be found in  
193 Appendix S2. All analyses were performed using R Statistical Software (version 4.0.2; R  
194 Foundation for Statistical Computing, Vienna, Austria).

195

## 196 RESULTS

197 A total of 6,632 opioid-involved overdose deaths were identified by the Connecticut OCME  
198 between 2009 and 2019, after excluding 27 deaths with residential addresses outside  
199 Connecticut. Among these, 3,234 (49%) were fentanyl-involved, and 3,398 (51%) were non-  
200 fentanyl-involved fatalities. The characteristics of these overdose deaths are described in Table  
201 1. People who died of fentanyl-involved overdose deaths were more likely to be male, Black,  
202 Hispanic, or involve at least one of the following substances: cocaine, xylazine, gabapentin or  
203 mitragynine, compared with those who died of non-fentanyl-involved overdose.

204

205 Figure 1 shows the observed temporal trend of fentanyl-involved overdose deaths and non-  
206 fentanyl overdose deaths in Connecticut during the study period 2009-2019. Fentanyl-involved  
207 overdose deaths increased significantly since 2014. In 2019, 977 (86%) of the 1,138 opioid-  
208 involved overdose deaths were fentanyl-involved, compared to 15 (6%) of 266 opioid-involved  
209 overdose deaths in 2009 and 36 (8%) of 429 opioid-involved overdose deaths in 2013. The  
210 yearly geographic patterns of observed proportion being fentanyl-involved among opioid-  
211 involved overdose deaths at the town level are shown in Appendix S3.

212

213 The marginal posterior distributions of spatial ( $\alpha_i$ ) and temporal ( $\gamma_t$ ) random effects of  
214 Bayesian space-time Poisson model for overall opioid-involved overdose deaths are shown in  
215 Figure 2. Some towns – Torrington and Southington – were at heightened risk of opioid-  
216 involved overdose deaths. The temporal trends showed the risk of opioid-involved overdose

217 deaths among residents in Connecticut increased substantially from 2009 to 2019, although  
218 there was a slight decrease in 2018.

219  
220 Based on the fitted Bayesian space-time binomial model for the proportion of fentanyl-involved  
221 overdose deaths, posterior distributions of the fixed-effect coefficients ( $\theta$ ) of covariates are  
222 summarized in Figure 3. Increased proportion of residents aged 55-64 in a city/town was  
223 associated with decreased probability being fentanyl-involved, given an opioid-involved  
224 overdose death in that town, with an odds ratio (OR) of 0.92 (95% compatibility interval [CI],  
225 0.86, 0.99). In addition, the proportion in poverty was negatively associated with the probability  
226 of a fatal overdose being fentanyl-involved (OR=0.95 [95% CI, 0.91, 0.99]).

227  
228 The marginal posterior distributions of spatial ( $\mu_i$ ) and temporal ( $\varphi_t$ ) random effects are  
229 summarized in Figure 4, along with geographic patterns across towns. Some areas had  
230 increased probability of fentanyl involvement, and the spatial modeling suggests that even after  
231 adjusting for the city/town level demographic covariates, the northeastern region of  
232 Connecticut had a higher probability of fentanyl-involved deaths, with Hartford, East Hartford  
233 and Manchester at the highest risk. In contrast, New Haven and its surrounding towns and the  
234 southwestern Connecticut—primarily Greenwich—had a lower probability of fentanyl-involved  
235 deaths. The temporal trends in Figure 4 describe main temporal trends similar to those  
236 observed in Figure 1, that is, that the probability of an opioid-involved overdose death being  
237 fentanyl-involved increased monotonically since 2014.

238

239 The city/town-level predicted probabilities of being a fentanyl-involved overdose death from  
240 the Bayesian space-time binomial model are shown in Figure 5. A higher probability being  
241 fentanyl-involved, given an opioid-involved overdose death, was first found in several towns in  
242 the northeastern region of Connecticut during 2009-2013. Beginning in 2014, the fentanyl  
243 “hotspots” started to spread across Connecticut.

244

245 A likelihood ratio test shows that the space-time interaction term of the Bayesian space-time  
246 binomial model for the proportion of fentanyl-involved opioid overdose deaths was not  
247 significantly different from zero, suggesting the geographic patterns of fentanyl-involved  
248 overdose deaths gradually overtook the preceding non-fentanyl opioid overdose deaths.

249

250 The results of the sensitivity analysis using Poisson model for fentanyl-involved overdose  
251 deaths in Connecticut were similar to those using a binomial logistic model and are described in  
252 Appendix S4.

253

## 254 **DISCUSSION**

255 In the present study we examined the town-level geographic patterns and yearly temporal  
256 trends of fentanyl-involved overdose deaths among Connecticut residents during 2009-2019  
257 and evaluated the relationship of fentanyl-involved overdose deaths with overall trends of  
258 opioid-involved overdose deaths. To our knowledge, this is the first study to map the spatial  
259 and temporal distributions of fentanyl-involved overdose deaths in Connecticut. We identified  
260 regions of Connecticut, particularly in the northeastern part of the state, as having relatively

261 high probability of an opioid overdose death being fentanyl-involved. The temporal trends  
262 show the fentanyl-involved overdose deaths in Connecticut increased significantly since 2014.  
263 We also found that the geographic pattern of fentanyl-involved overdose deaths was relatively  
264 constant over time and gradually replaced the preceding wave of opioid-involved overdose  
265 deaths.

266  
267 Our findings show that, compared with non-fentanyl overdose deaths, people who died of  
268 fentanyl-involved overdose are more likely to be Black or Hispanic in Connecticut, suggesting  
269 that these groups are disproportionately affected by the most recent waves of opioid crisis.  
270 These results are consistent with the findings from previous studies that examined opioid-  
271 involved overdose deaths in other regions and across the US.<sup>23-25</sup> More research is warranted  
272 to address the social determinants of fentanyl-involved overdose deaths among Black and  
273 Hispanic communities, and locally informed harm reduction efforts and services should be  
274 targeted to these populations.

275  
276 Our results indicated that the northeastern region of Connecticut had higher probability of an  
277 opioid overdose death being fentanyl-involved whereas New Haven, its surrounding towns, and  
278 the southwestern Connecticut had a lower probability. This suggests that the Connecticut  
279 supply of fentanyl and its analogues may have originally entered Connecticut from the north,  
280 gradually diffused from the northeastern to southwestern Connecticut, and most recently has  
281 dispersed across the state. Our findings also suggest that the fentanyl-involved overdose deaths  
282 might simply replace the preceding waves of opioid overdose deaths (e.g., heroin), rather than

283 create new overdose risk following distinct geographic patterns. These findings were in line  
284 with the facts that fentanyl and its analogues entered into illicit drug supply as an “adulterant”  
285 in powder heroin and counterfeit pills in Northeast.<sup>26</sup> The growing presence and strong potency  
286 of fentanyl and its analogues then led to the significant increase in opioid overdose deaths  
287 across Connecticut in recent years.

288

289 Our study is subject to several limitations. First, although we adjusted for city/town-level  
290 demographic covariates in our Bayesian space-time models, it is possible that this ecological  
291 analysis obscures individual-level relationships between time, place, and overdose risk. We  
292 described the geographic patterns and temporal trends of fentanyl-involved overdose deaths at  
293 the city/town level only and could not examine in detail the potential social determinants for an  
294 opioid overdose death being fentanyl-involved. Second, we primarily used injury addresses for  
295 the geographic locales and used residential or death addresses only when injury address was  
296 missing, which may lead to geographical misclassification. However, most deaths occurred  
297 within person’s own residence so that the injury and residential addresses were the same.  
298 Moreover, death addresses were often in the hospital near the injury place. Therefore, we  
299 expect that the influence of geographic misclassification on our study findings was minimal.

300 Lastly, while we investigated the spatial and temporal trends of fentanyl-involved overdose  
301 deaths, we did not explore the trends of overdose deaths that involved both fentanyl and other  
302 substances such as methamphetamine. Further studies are needed to investigate the spatial  
303 and temporal trends of polysubstance use with fentanyl in Connecticut.

304

305 In conclusion, given the high probability of an overdose death being fentanyl-involved, more  
306 research should be devoted to exploring the social determinants and supply-side drivers of  
307 fentanyl-involved overdose deaths in order to better inform future harm reduction services and  
308 policies to halt the current opioid crisis.

309

## 310 REFERENCES:

- 311 1. Ciccarone D. The triple wave epidemic: Supply and demand drivers of the US opioid  
312 overdose crisis. *Int J Drug Policy*. 2019;71:183-188. doi:10.1016/j.drugpo.2019.01.010
- 313 2. Dasgupta N, Beletsky L, Ciccarone D. Opioid Crisis: No Easy Fix to Its Social and Economic  
314 Determinants. *Am J Public Health*. 2018;108(2):182-186. doi:10.2105/AJPH.2017.304187
- 315 3. Zoorob M. Fentanyl shock: The changing geography of overdose in the United States. *Int*  
316 *J Drug Policy*. 2019;70:40-46. doi:10.1016/j.drugpo.2019.04.010
- 317 4. Suzuki J, El-Haddad S. A review: Fentanyl and non-pharmaceutical fentanyls. *Drug Alcohol*  
318 *Depend*. 2017;171:107-116. doi:10.1016/j.drugalcdep.2016.11.033
- 319 5. Prekupec MP, Mansky PA, Baumann MH. Misuse of Novel Synthetic Opioids: A Deadly  
320 New Trend. *J Addict Med*. 2017;11(4):256-265. doi:10.1097/ADM.0000000000000324
- 321 6. Division USDEADC. National Forensic Laboratory Information System: 2014 Annual  
322 Report. Published online 2014.
- 323 7. U.S. Drug Enforcement Administration Diversion Control Division. National Forensic  
324 Laboratory Information System:NFLIS-Drug 2019 Annual Report. Published online 2019.  
325 [https://www.nflis.deadiversion.usdoj.gov/DesktopModules/ReportDownloads/Reports/](https://www.nflis.deadiversion.usdoj.gov/DesktopModules/ReportDownloads/Reports/NFLIS-Drug-AR2019.pdf)  
326 [NFLIS-Drug-AR2019.pdf](https://www.nflis.deadiversion.usdoj.gov/DesktopModules/ReportDownloads/Reports/NFLIS-Drug-AR2019.pdf)



- 327 8. Spencer MR, Warner M, Bastian BA, et al. Drug Overdose Deaths Involving Fentanyl,  
328 2011-2016. *Natl Vital Stat Reports*. 2018;68(3).  
329 [https://stacks.cdc.gov/view/cdc/77832%0Ahttps://www.cdc.gov/nchs/products/index.ht](https://stacks.cdc.gov/view/cdc/77832%0Ahttps://www.cdc.gov/nchs/products/index.htm)  
330 [m](https://stacks.cdc.gov/view/cdc/77832%0Ahttps://www.cdc.gov/nchs/products/index.htm).
- 331 9. Rudd RA, Seth P, David F, Scholl L. Increases in Drug and Opioid-Involved Overdose  
332 Deaths — United States. *Morb Mortal Wkly Rep*. 2016;65:1445-1452.
- 333 10. Hedegaard H, Miniño AM, Warner M. Drug Overdose Deaths in the United States, 1999-  
334 2018. *NCHS Data Brief*. 2020;356.
- 335 11. Mattson CL, Tanz LJ, Quinn K, Kariisa M, Patel P, Davis NL. Morbidity and Mortality  
336 Weekly Report Trends and Geographic Patterns in Drug and Synthetic Opioid Overdose  
337 Deaths-United States, 2013-2019. *Morb Mortal Wkly Rep*. 2021;70(6):202-207.  
338 <https://www.cdc.gov/nchs/data/nvsr/nvsr61/>
- 339 12. Gladden RM, O'Donnell J, Mattson CL, Seth P. Changes in Opioid-Involved Overdose  
340 Deaths by Opioid Type and Presence of Benzodiazepines, Cocaine, and  
341 Methamphetamine — 25 States, July–December 2017 to January–June 2018. *MMWR*  
342 *Morb Mortal Wkly Rep*. 2019;68(34):737-744. doi:10.15585/mmwr.mm6834a2
- 343 13. Marshall BDL, Krieger MS, Yedinak JL, et al. Epidemiology of fentanyl-involved drug  
344 overdose deaths: A geospatial retrospective study in Rhode Island, USA. *Int J Drug Policy*.  
345 2017;46:130-135. doi:10.1016/j.drugpo.2017.05.029
- 346 14. Nesoff ED, Branas CC, Martins SS. The geographic distribution of fentanyl-involved  
347 overdose deaths in Cook County, Illinois. *Am J Public Health*. 2020;110(1):98-105.  
348 doi:10.2105/AJPH.2019.305368

- 349 15. Rhee TG, Ross JS, Rosenheck RA, Grau LE, Fiellin DA, Becker WC. Accidental drug  
350 overdose deaths in Connecticut, 2012–2018: The rise of polysubstance detection? *Drug*  
351 *Alcohol Depend.* 2019;205(September):107671. doi:10.1016/j.drugalcdep.2019.107671
- 352 16. Green TC, Grau LE, Carver HW, Kinzly M, Heimer R. Epidemiologic trends and geographic  
353 patterns of fatal opioid intoxications in Connecticut, USA: 1997-2007. *Drug Alcohol*  
354 *Depend.* 2011;115(3):221-228. doi:10.1016/j.drugalcdep.2010.11.007
- 355 17. Cambon J. Package 'tidygeocoder.' CRAN. Published online 2021:2-13.
- 356 18. Bureau UC. American Community Survey Data. [https://www.census.gov/programs-](https://www.census.gov/programs-surveys/acs/data.html)  
357 [surveys/acs/data.html](https://www.census.gov/programs-surveys/acs/data.html)
- 358 19. Besag J, York J, Mollié A. Bayesian image restoration, with two applications in spatial  
359 statistics. *Ann Inst Stat Math.* Published online 1991. doi:10.1007/BF00116466
- 360 20. Lawson AB. *Bayesian Disease Mapping: Hierarchical Modeling in Spatial Epidemiology,*  
361 *3rd Edition.*; 2018.
- 362 21. Rue H, Martino S. Approximate Bayesian inference for latent Gaussian models by using  
363 integrated nested Laplace approximations. *J R Stat Soc Ser B Stat Methodol.*  
364 2009;71(2):319-392.
- 365 22. Blangiardo M, Cameletti M, Baio G, Rue H. Spatial and spatio-temporal models with R-  
366 INLA. *Spat Spatiotemporal Epidemiol.* 2013;7:39-55. doi:10.1016/j.sste.2013.07.003
- 367 23. Laroche MR, Slavova S, Root ED, et al. Disparities in Opioid Overdose Death Trends by  
368 Race/Ethnicity, 2018-2019, from the HEALing Communities Study. *Am J Public Health.*  
369 2021;111(10):1851-1854. doi:10.2105/AJPH.2021.306431
- 370 24. Lippold KM, Jones CM, Olsen EO, Giroir BP. Racial/Ethnic and Age Group Differences in

- 371 Opioid and Synthetic Opioid–Involved Overdose Deaths Among Adults Aged  $\geq 18$  Years in  
372 Metropolitan Areas — United States, 2015–2017. *MMWR Morb Mortal Wkly Rep.*  
373 2019;68(43):967-973. doi:10.15585/mmwr.mm6843a3
- 374 25. Townsend T, Kline D, Rivera-Aguirre A, et al. Racial/Ethnic and Geographic Trends in  
375 Combined Stimulant/Opioid Overdoses, 2007–2019. *Am J Epidemiol.* 2022;191(4):599-  
376 612. doi:10.1093/aje/kwab290
- 377 26. R.M. G, P. M, P. S. Fentanyl Law Enforcement Submissions and Increases in Synthetic  
378 Opioid-Involved Overdose Deaths - 27 States, 2013-2014. *MMWR Morb Mortal Wkly*  
379 *Rep.* 2016;65(33):837-843.  
380 <http://www.embase.com/search/results?subaction=viewrecord&from=export&id=L6164>  
381 [49279%0Ahttp://dx.doi.org/10.15585/mmwr.mm6533a2](http://dx.doi.org/10.15585/mmwr.mm6533a2)  
382

383 Table 1. Characteristics of fentanyl-involved overdose deaths among Connecticut residents, 2009-2019

|                                            | Fentanyl-involved<br>Overdose deaths | Non-fentanyl<br>Overdose deaths | Total sample |
|--------------------------------------------|--------------------------------------|---------------------------------|--------------|
|                                            | n=3234                               | n=3398                          | n=6632       |
| Age at death (years), No. (%) <sup>*</sup> |                                      |                                 |              |
| <25                                        | 260 (8.0)                            | 287 (8.4)                       | 547 (8.2)    |
| 25-34                                      | 879 (27.2)                           | 775 (22.8)                      | 1654 (24.9)  |
| 35-44                                      | 854 (26.4)                           | 785 (23.1)                      | 1639 (24.7)  |
| 45-54                                      | 718 (22.2)                           | 923 (27.2)                      | 1641 (24.7)  |
| 55-64                                      | 461 (14.3)                           | 533 (15.7)                      | 994 (15.0)   |
| 65+                                        | 62 (1.9)                             | 95 (2.8)                        | 157 (2.4)    |
| Female, No. (%)                            | 697 (21.6)                           | 1025 (30.2)                     | 1722 (26.0)  |
| Race/ethnicity, No. (%)                    |                                      |                                 |              |
| White, non-Hispanic                        | 2445 (75.6)                          | 2823 (83.1)                     | 5268 (79.4)  |
| Black, non-Hispanic                        | 293 (9.1)                            | 197 (5.8)                       | 490 (7.4)    |
| Hispanic                                   | 445 (13.8)                           | 338 (9.9)                       | 783 (11.8)   |
| Other <sup>a</sup>                         | 51 (1.6)                             | 40 (1.2)                        | 91 (1.4)     |
| Substance present, No. (%)                 |                                      |                                 |              |
| Heroin/morphine                            | 1430 (44.3)                          | 2000 (61.0)                     | 3430 (51.7)  |
| Pharmaceutical opioids <sup>b</sup>        | 320 (9.9)                            | 990 (29.1)                      | 1310 (19.8)  |
| Methadone                                  | 202 (6.2)                            | 573 (16.9)                      | 775 (11.7)   |
| Buprenorphine                              | 72 (2.2)                             | 92 (2.7)                        | 164 (2.5)    |
| Benzodiazepine                             | 897 (27.7)                           | 1276 (37.6)                     | 2173 (32.8)  |
| Cocaine                                    | 1265 (39.1)                          | 773 (22.7)                      | 2038 (30.7)  |
| Ethanol                                    | 951 (29.4)                           | 1032 (30.4)                     | 1983 (29.9)  |
| Methamphetamine                            | 141 (4.4)                            | 105 (3.1)                       | 246 (3.7)    |
| Xylazine                                   | 73 (2.3)                             | 1 (0.0)                         | 74 (1.1)     |
| Gabapentin                                 | 239 (7.4)                            | 125 (3.7)                       | 364 (5.5)    |
| Mitragynine                                | 31 (1.0)                             | 10 (0.3)                        | 41 (0.6)     |

384 <sup>a</sup> Other includes Asian, American Indian, bi-racial, or other racial/ethnic groups

385 <sup>b</sup> Pharmaceutical opioids include di-H-codeine, hydromorphone, hydrocodone, oxycodone, and tramadol, but  
 386 do not include methadone and buprenorphine.

387 Figure 1. Monthly temporal trend fentanyl-involved overdose deaths among Connecticut residents, 2009-2019. This stacked figure  
388 shows, as the number of overdose deaths increased, the share of overdose deaths involving fentanyl increased as well.  
389  
390

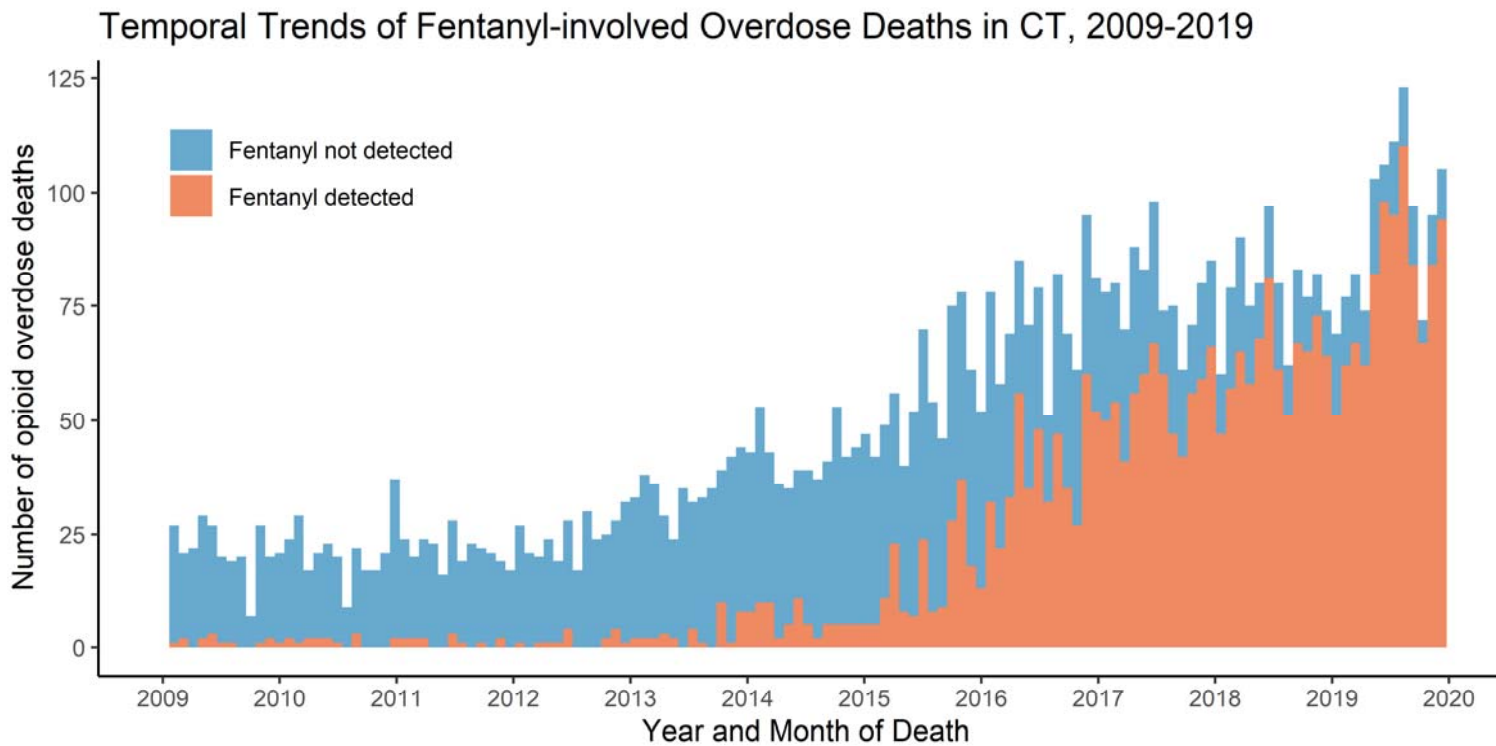

391  
392

393 Figure 2: Marginal posterior means of the autoregressive spatial ( $\alpha_i$ ) and temporal ( $\gamma_t$ ) random effects (relative risk) from the  
394 Bayesian space-time Poisson model for overall opioid-involved overdose deaths. The left panel depicts the spatial patterns of overall  
395 opioid-involved overdose deaths when holding temporal terms constant. The right panel depicts the temporal patterns of overall  
396 opioid-involved overdose deaths when holding spatial terms constant. The random effects were exponentiated. Larger values of  
397 relative risk indicate the higher risk of opioid-involved overdose deaths at town level in Connecticut.

Relative Risk

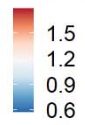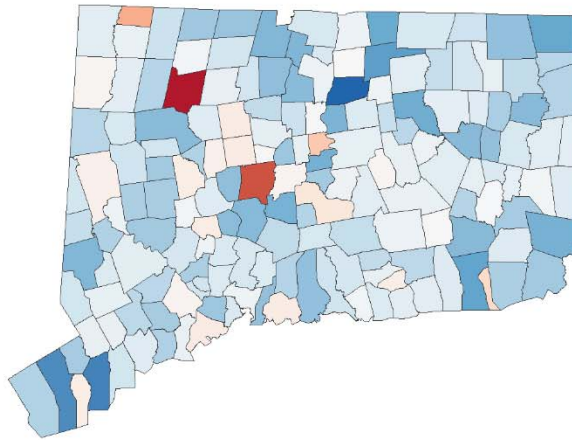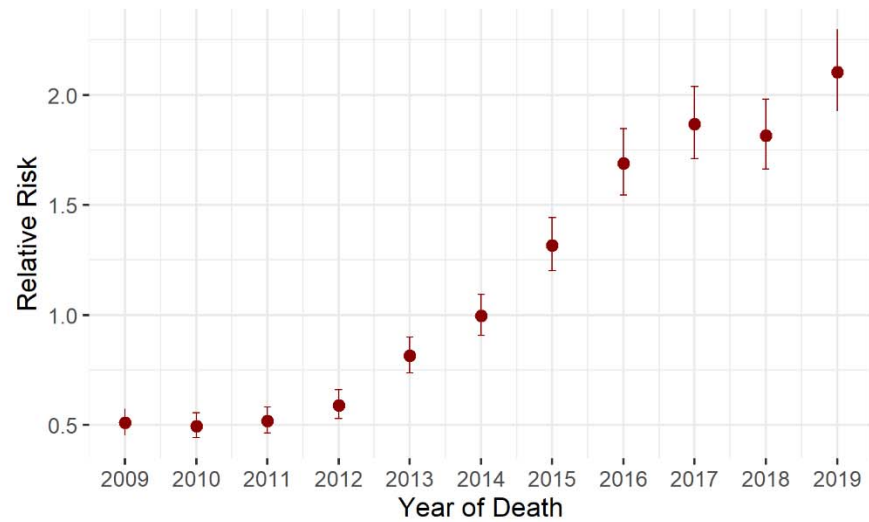

398

399 Figure 3. Summary of the posterior means and 95% compatibility intervals (CIs) of the fixed effect coefficients of covariates. The  
 400 regression coefficients are exponentiated to represent exponentiated coefficients from binomial logistic regression.

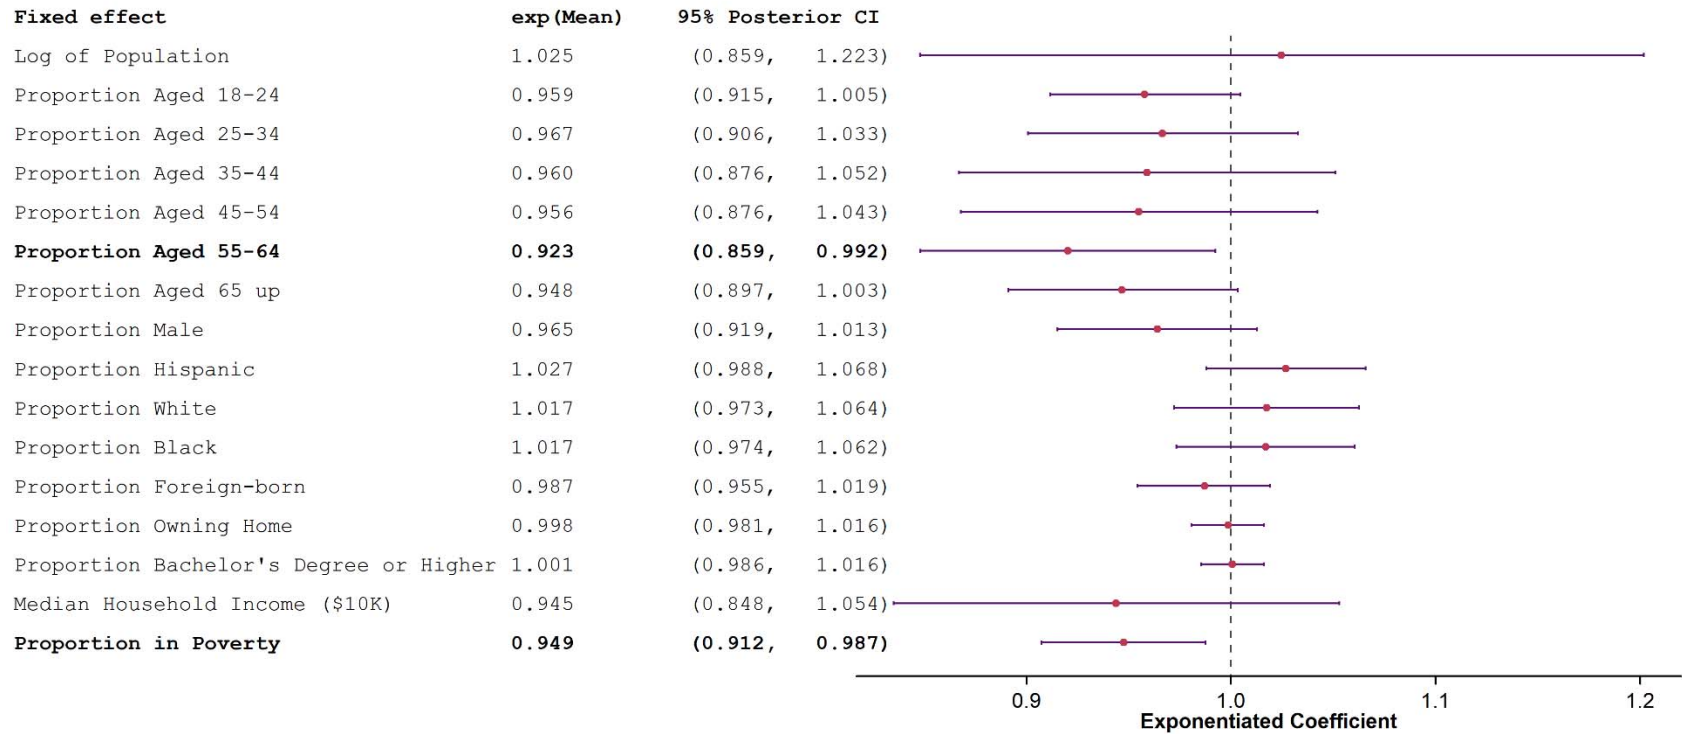

401  
 402

403 Figure 4: Marginal posterior means of the autoregressive spatial ( $\mu_i$ ) and temporal ( $\varphi_t$ ) random effects from the Bayesian space-  
404 time binomial model for fentanyl-involved overdose deaths. The left panel depicts the spatial patterns of fentanyl-involved overdose  
405 deaths when holding temporal terms constant. The right panel depicts the temporal patterns of fentanyl-involved overdose  
406 deaths when holding spatial terms constant. The random effects were exponentiated. Larger values of exponentiated coefficients indicate  
407 the higher probability being fentanyl involved given an opioid overdose death at town level in Connecticut.

Exponentiated  
Coefficients

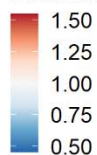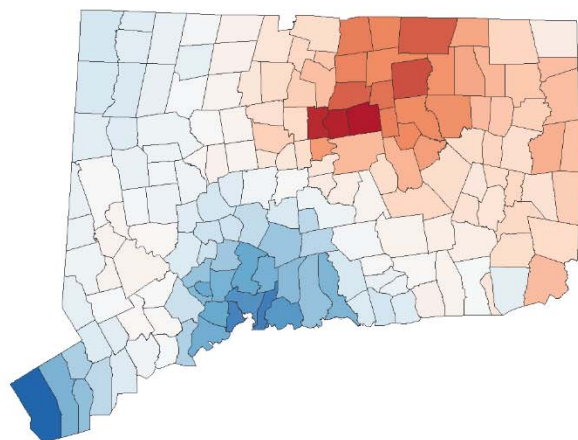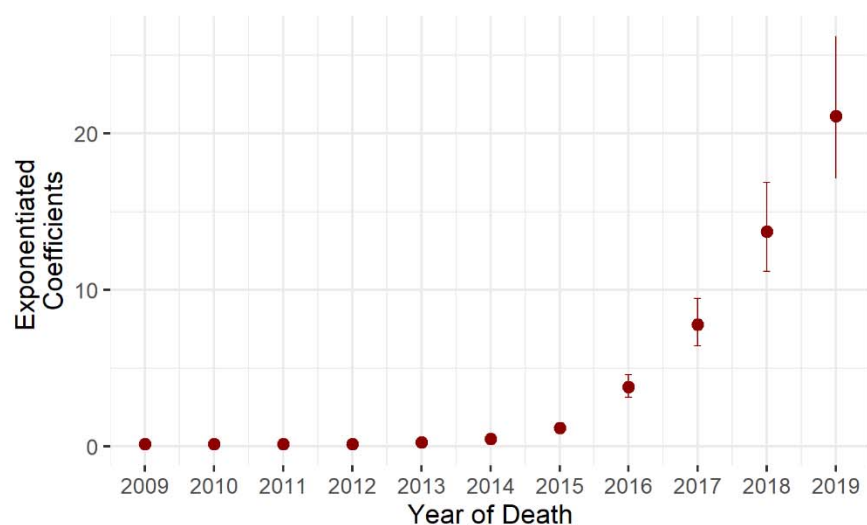

408  
409



410 Figure 5. The predicted probability of an overdose death being fentanyl-involved from the Bayesian space-time binomial model,  
411 stratified by town and calendar year, Connecticut. Color scales differ by year to show the distribution within each year.

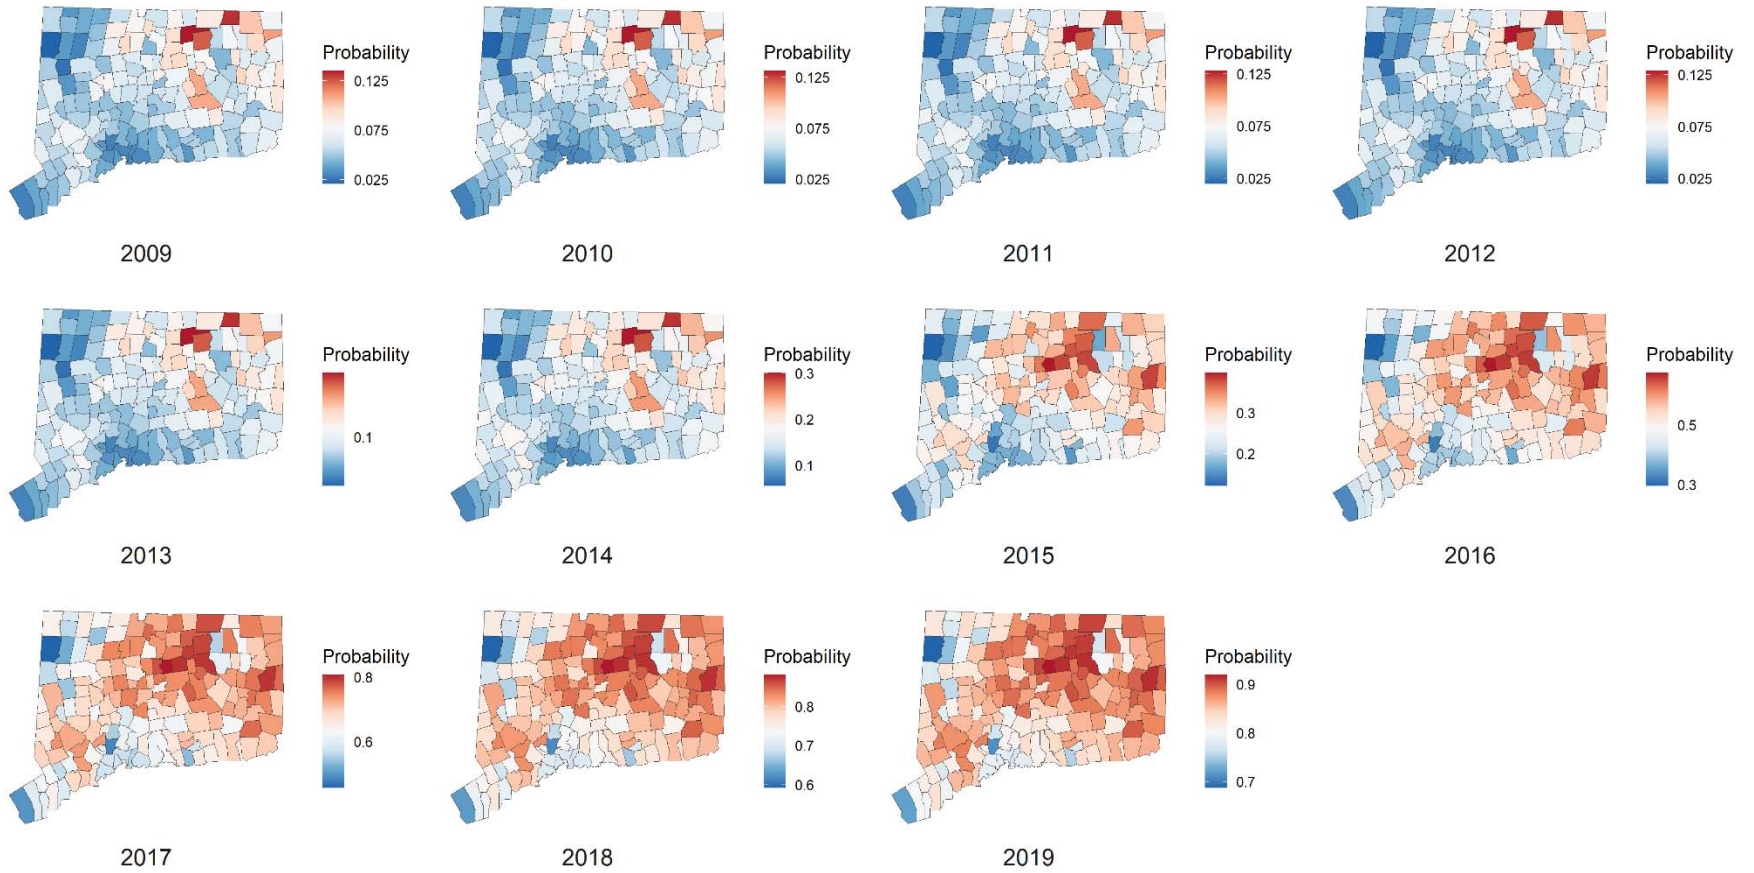

412  
413

414 **Appendix**

415 **Appendix S1**

416 **Priors on random effects in Bayesian space-time Poisson model for overall opioid-involved overdose deaths**

$$\log(\lambda_{it}) = \mathbf{x}_{it}^T \boldsymbol{\beta} + \alpha_i + \gamma_t + \delta_{it} + \log(\text{pop}_n)$$

$$\alpha_i = u_i + v_i, \quad u_i \sim N(0, \tau_u^{-1} Q^-), \quad v_i \sim N(0, \tau_v^{-1} I)$$

$$\gamma_t = \Delta\pi_i + \rho_t, \quad \Delta\pi_i = \pi_i - \pi_{i-1} \sim N(0, \tau_\pi^{-1}), \quad \rho_t \sim N(0, \tau_\rho^{-1} I),$$

417 where  $u_i \sim N(0, \tau_u^{-1} Q)$  represents the spatial structured random effect and is modeled under the class of intrinsic Gaussian Markov  
418 random fields models.  $Q$  denotes the precision matrix (neighboring matrix), and  $Q^-$  is the generalized inverse of the matrix  $Q$ . The  
419 marginal variances are  $\tau_u^{-1} [Q^-]_{ii}$ , which are dependent on the matrix  $Q$ .  $v_i \sim N(0, \tau_v^{-1} I)$  is the spatial unstructured random effect  
420 and  $\tau_v^{-1}$  is the marginal variance. Gamma priors with small rate parameters are commonly assigned to  $\tau_u$  and  $\tau_v$ . Here, Gamma(1,  
421 0.0005) is considered.

422

423  $\Delta\pi_i = \pi_i - \pi_{i-1} \sim N(0, \tau_\pi^{-1})$  is first order random walk temporal random effect defined as a random step at each point in time ( $\Delta\pi_i$ ).  
424 All random steps are independent and identically distributed.  $\rho_t \sim N(0, \tau_\rho^{-1} I)$  is the temporal unstructured random effect and  $\tau_\rho^{-1}$  is  
425 the marginal variance. Gamma priors with small rate parameters are commonly assigned to  $\tau_\pi$  and  $\tau_\rho$ . Here, Gamma(1, 0.0005) is  
426 considered.

427

428 **Appendix S2: Model Comparison**

429 Appendix S2.1: Model Comparison for overall opioid-involved overdose deaths

430 For overall opioid-involved overdose deaths, Poisson models were used to estimate the mean number of opioid-involved overdose  
431 deaths in each town at each year from 2009-2019. Concerning some towns with 0 opioid-involved overdose deaths. Zero-inflated  
432 Poisson models were also examined. Deviance information criterion (DIC) and Watanabe-Akaike information criterion were used to  
433 compare Poisson model and zero-inflated Poisson model.  
434

435 Appendix S2. Table 1: Model Comparison for overall opioid-involved overdose deaths

| Model                      | DIC     | WAIC    |
|----------------------------|---------|---------|
| Poisson (in the main text) | 5726.50 | 5733.06 |
| Zero-inflated Poisson      | 6525.00 | 6528.64 |

436

437 Based on DIC and WAIC, Poisson model is selected.

438

439 Appendix S2.2: Model Comparison for fentanyl-involved overdose deaths

440 For fentanyl-involved overdose death among all opioid-involved overdose deaths, binomial model and logistic regression were used  
441 to estimate the probability being fentanyl-involved given an opioid overdose death in each town at each year from 2009-2019.  
442 Several parsimonious models, in addition to the logistic model mentioned in the main text were examined. DIC and WAIC were used  
443 for model comparison.  
444

445 Appendix S2. Table 2: Model Comparison for fentanyl-involved overdose deaths

| Model                                                                                                                                        | DIC     | WAIC    |
|----------------------------------------------------------------------------------------------------------------------------------------------|---------|---------|
| Conditional autoregressive term at town level + linear calendar year + unstructured temporal term for calendar year + demographic covariates | 2175.64 | 2182.10 |
| Conditional autoregressive term at town level + first-order random walk structured temporal term for calendar year + demographic covariates  | 2172.43 | 2178.53 |
| Conditional autoregressive term at town                                                                                                      | 2172.51 | 2178.61 |

|                                                                                                                                                                                                                                                             |         |         |
|-------------------------------------------------------------------------------------------------------------------------------------------------------------------------------------------------------------------------------------------------------------|---------|---------|
| level + first-order random walk structured temporal term for calendar year + unstructured temporal term for calendar year + demographic covariates                                                                                                          |         |         |
| Conditional autoregressive term at town level + first-order random walk structured temporal term for calendar year + space-time interaction term + demographic covariates                                                                                   | 2172.39 | 2178.49 |
| Conditional autoregressive term at town level + first-order random walk structured temporal term for calendar year + unstructured temporal term for calendar year + space-time interaction term + demographic covariates (model specified in the main text) | 2172.44 | 2178.53 |

446  
447  
448  
449  
450

Based on DIC and WAIC, the binomial model including conditional autoregressive term at town level, first-order random walk structured temporal term for calendar year, space-time interaction term, and demographic covariates, without unstructured temporal term, was selected.

451 **Appendix S3**

452 Appendix S3. Figure 1. Spatial patterns of observed proportion being fentanyl-involved among opioid overdose deaths at the  
453 city/town level, stratified by year, 2009-2019. Towns with grey color represent no opioid-related deaths.

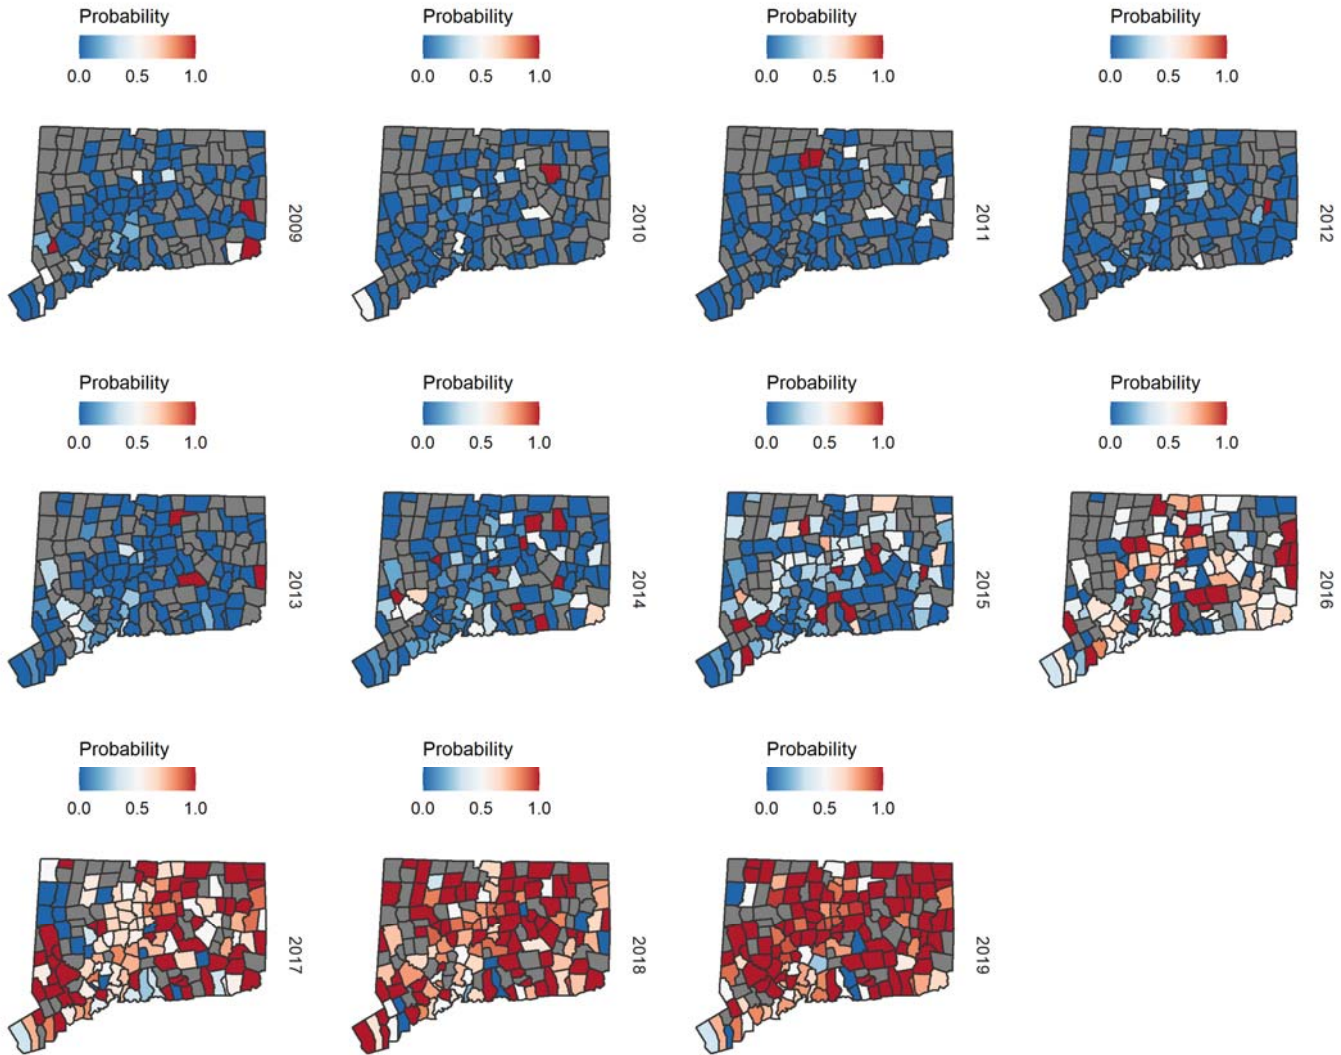

454

455 **Appendix S4**

456 Poisson model was used as an alternative to binomial model to estimate the risk of fentanyl-involved overdose deaths among  
457 opioid-involved overdose deaths at town level in Connecticut, 2009-2019. Specifically, we modelled the number of fentanyl-involved  
458 overdose deaths  $y_{it}$  in town  $i$  during year  $t$  as independently and identically Poisson distributed variables with mean  $\mu_{it}$ ,

$$y_{it} \sim \text{Poisson}(\mu_{it})$$

459 Then the logarithm of the mean number of fentanyl-involved overdose deaths ( $\mu_{it}$ ) is modeled as

$$\log(\mu_{it}) = \mathbf{x}_{it}^T \boldsymbol{\beta} + \alpha_i + \varphi_t + \delta_{it} + \log(od\_n)$$

460 where  $\mathbf{x}_{it}$  is the vector of covariates for town  $i$  at year  $t$  (including the time-varying and space-varying variables from ACS as  
461 aforementioned), and  $\boldsymbol{\beta}$  is a vector of fixed effect coefficients for  $\mathbf{x}_{it}$ . In addition,  $\alpha_i$  in the model is town-level spatial main effect,  
462  $\varphi_t$  is the yearly temporal main effect, and  $\delta_{it}$  is the interaction term between space (town level) and time (year). The number of  
463 overall opioid-involved overdose deaths in each town in each year was used as an offset  $\log(od\_n)$ .

464

465 Specifically, the spatial term  $\alpha_i$  is a random effect that follows the conditional autoregressive model proposed by Besag, York and  
466 Mollie.<sup>19</sup> The random effect can be further decomposed into two components, an intrinsic conditional autoregressive term that  
467 smooths each town-level estimate by forming a weighted average with all adjacent census tracts, plus spatially unstructured  
468 component that models independent location-specific error and is assumed to be independently identically normally distributed  
469 across towns. The temporal trend  $\varphi_t$ , is modeled by the sum of two components, a first-order random walk-correlated time

470 component, and a temporally unstructured component that models independent year-specific error and is independently identically  
471 and normally distributed across calendar years. The space-time interaction term  $\delta_{it}$ , is modelled as an independent noise term for  
472 each town and time period, and allows for temporal trends in a given towns to deviate from the overall spatial and temporal trends  
473 given by  $\alpha_i$  and  $\varphi_t$ , such that local patterns can emerge across time and space. The results were shown in Appendix S4 Figure 1.  
474

475 Appendix S4. Figure 1. Marginal posterior means of the autoregressive spatial ( $\alpha_i$ ) and temporal ( $\varphi_t$ ) random effects from the  
476 Bayesian space-time Poisson model for fentanyl-involved overdose deaths. The random effects were exponentiated. Larger values of  
477 exponentiated coefficients indicate the higher risk of being fentanyl involved among all opioid overdose death at town level in  
478 Connecticut.

Relative Risk

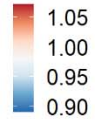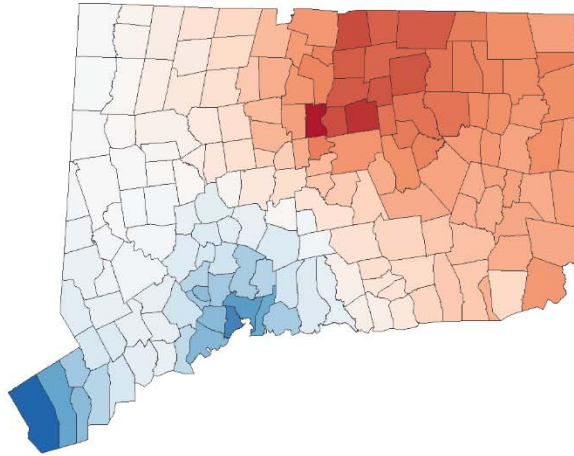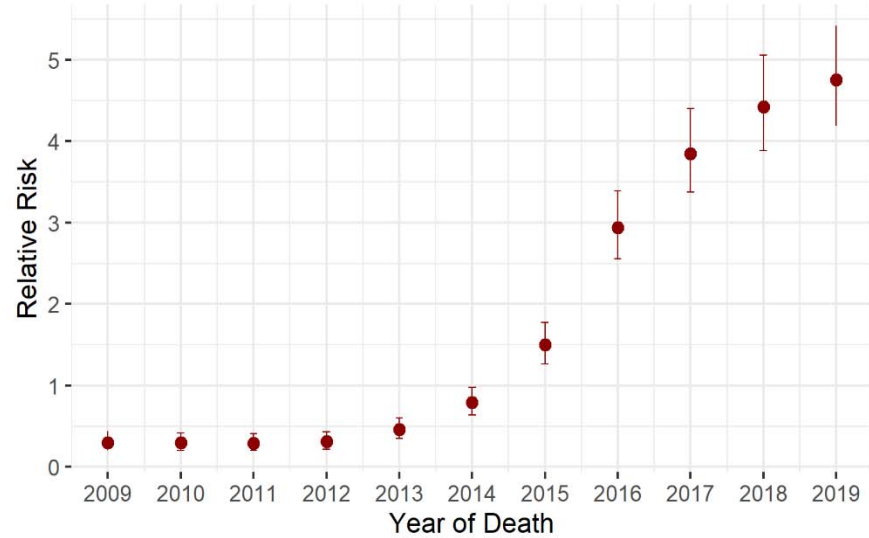

479
